# Supplementary material for: Vitamin E sequestration by liver fat in humans
Source: JCI journal article supplement (doi:10.1172/jci.insight.133309), 2019-12-10
Supplement: sd1 [file 1]

## SUPPLEMENTARY FILES

## Supplementary Table 1

Pharmacokinetics parameters derived from the plasma following 5mg and 2mg IV d6- $\alpha$ -tocopherol administration to 6 healthy (Subjects matched).

| Parameter                              |                  | IV d6 $\alpha$ -tocopherol                   |          |
|----------------------------------------|------------------|----------------------------------------------|----------|
|                                        |                  |                                              | p-values |
| Elimination Rate ( $K_e$ )             | 5mg intervention | 0.0214 $\pm$ 0.002                           | NS       |
|                                        | 2mg intervention | 0.0236 $\pm$ 0.001                           |          |
| Half-life (h)                          | 5mg intervention | 33.7 $\pm$ 3.0                               | NS       |
|                                        | 2mg intervention | 30.0 $\pm$ 1.4                               |          |
| $C_{max}$ ( $\mu$ M) <sup>1</sup>      | 5mg intervention | 1.06 $\pm$ 0.09 emp.<br>1.06 $\pm$ 0.05 mod. | <0.001   |
|                                        | 2mg intervention | 0.48 $\pm$ 0.02 emp.<br>0.48 $\pm$ 0.04 mod. |          |
| $T_{max}$ (h) <sup>2</sup>             | 5mg intervention | 6.7 $\pm$ 0.3                                | NS       |
|                                        | 2mg intervention | 7.7 $\pm$ 1.1                                |          |
| $AUC_{0-72}$ ( $\mu$ M-h) <sup>3</sup> | 5mg intervention | 43.0 $\pm$ 4.8 emp.<br>43.0 $\pm$ 3.1 mod.   | <0.001   |
|                                        | 2mg intervention | 17.5 $\pm$ 0.9 emp.<br>17.5 $\pm$ 2.4 mod.   |          |

Pharmacokinetics parameters derived from the plasma d6- $\alpha$ -T concentrations following 5mg and 2mg IV d6  $\alpha$ -tocopherol administration to 6 healthy (Mean  $\pm$  SEM).

- (1)  $C_{max}$ , maximum concentration post-nadir for the IV dose.
- (2)  $T_{max}$ , Time of maximum concentration post-nadir for the IV dose.
- (3)  $AUC_{0-72}$  is calculated from the plasma concentrations from 0 to 72 h.  $AUC_{0-8h}$  is calculated from the plasma concentration from 0 to 8h corresponding to the time of  $C_{max}$  for d6- $\alpha$ -tocopherol.  $C_{max}$ , maximal concentration;  $T_{max}$ , time of maximum concentration,  $K_e$ ; Constant of elimination; emp., empirical standard errors of the mean (SEM); mod., Mixed-effects model-based standard errors of the mean.

# Supplementary figure 1

Initial disappearance of d6- $\alpha$ -tocopherol in Healthy and HS patient.

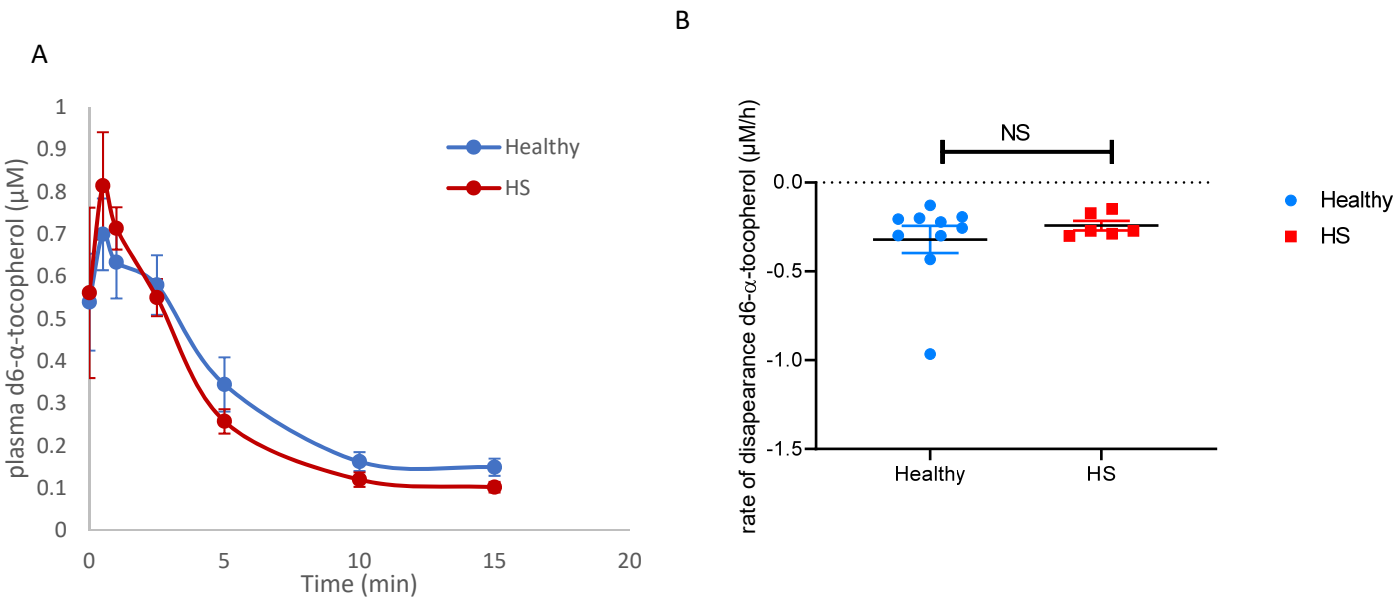

Initial disappearance of d6- $\alpha$ -tocopherol in 10 Healthy and 6 HS patient from 0 to 15min following IV injection of 2mg d6- $\alpha$ -tocopherol (a) or matched to patient status (b). Statistics . Statistics: (a) two-way ANOVA (multiple comparisons), (b) Student's t test (Unpaired, Two-tailed).

## Supplementary Figure 2

Fat traps vitamin E *in vitro*

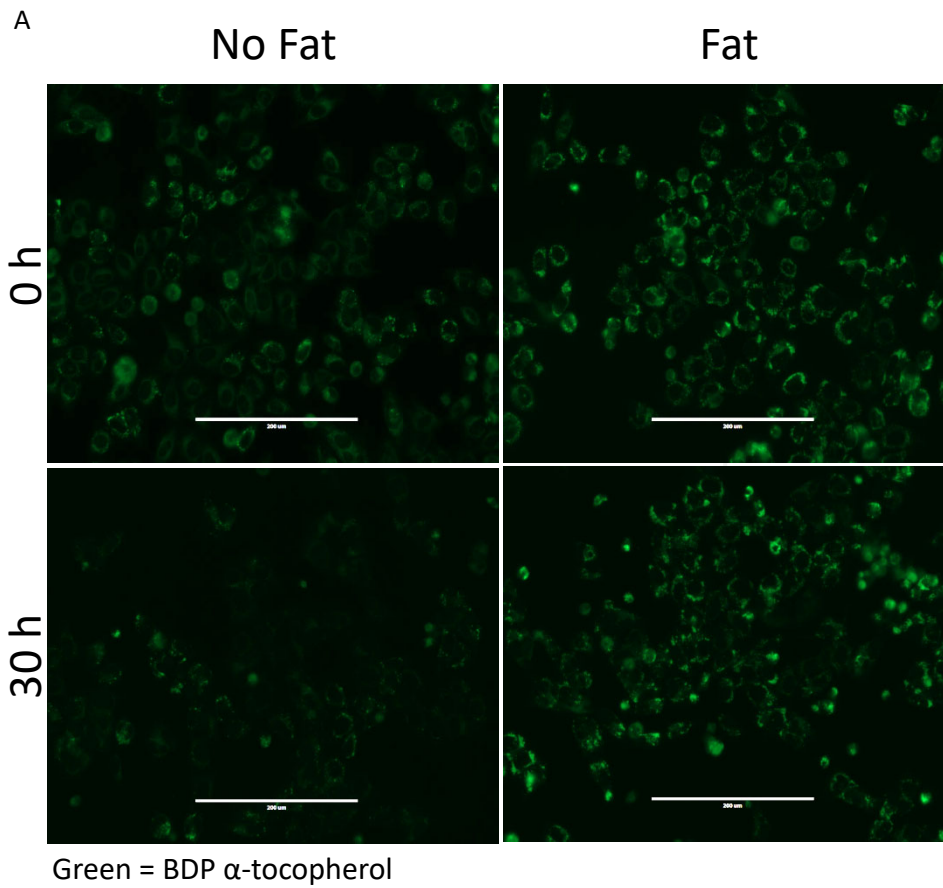

(a) IHH cells loaded with or without 100 $\mu$ M of oleic acid for 24h, followed by incubation with 10 $\mu$ M BDP- $\alpha$ -tocopherol (green) for 2h. Images were taken at this time (0h), or 30h later after incubation in media without BDP- $\alpha$ -tocopherol.

# Supplementary Figure 3

d6-, d3- $\alpha$ -Tocopherol %enrichment into lipoproteins in 10 healthy vs 6 HS women

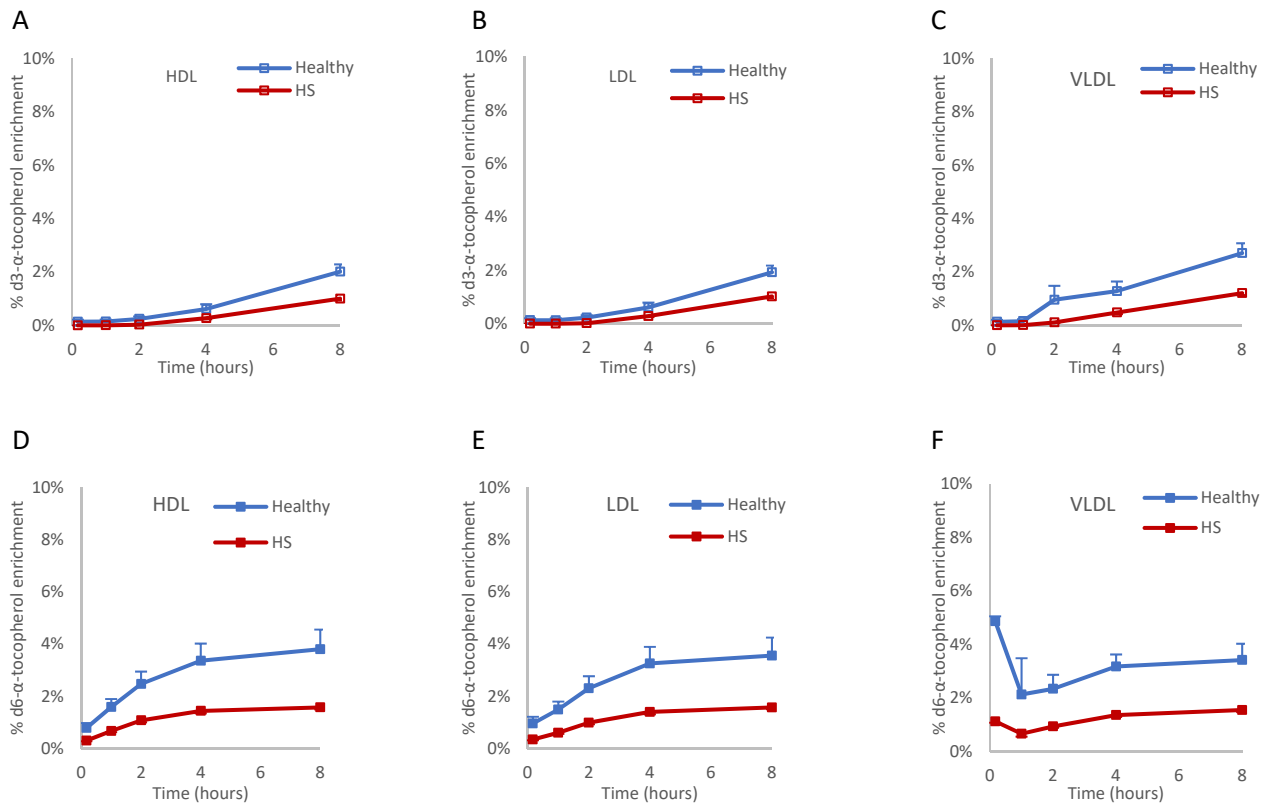

(a-c) percent d3- $\alpha$ -tocopherol (d-f) and percent d6- $\alpha$ -tocopherol enrichment for VLDL, LDL and HDL from 0 to 8 hours in 10 healthy (□, ■) and 6 HS (□, ■) subjects following 2mg IV and oral administration of deuterated tocopherols. Statistics: two-way ANOVA (multiple comparisons).

# Supplementary figure 4

Plasma concentrations of d6-α-tocopherol healthy and 6 HS women

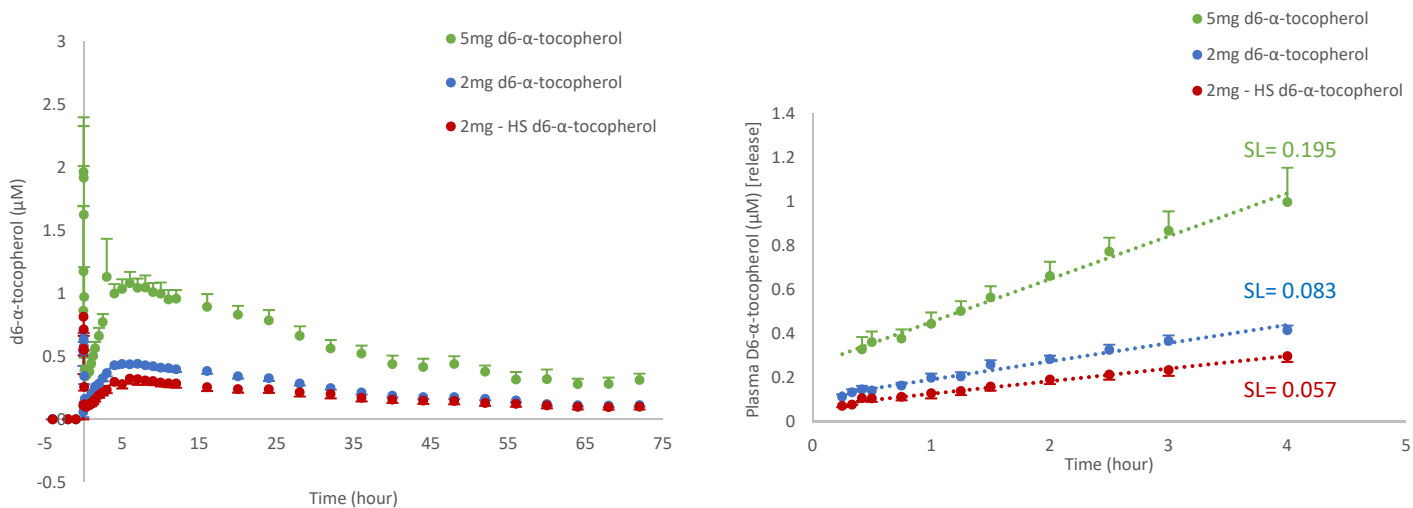

A) d6-α-tocopherol 5mg ( ● ), 2mg ( ● ) and 2mg ( ● ) in HS subjects was administered intravenously at time zero, plasma samples obtained over 72h. (b) Initial disappearance of d6 α-tocopherol in Healthy (5mg ( ● ), 2mg ( ● ) and 2mg in HS subjects ( ● ) (0-72h). Data for d6-α-tocopherol 2 and 5mg for healthy subjects are also shown in figure 1G\_Inset. SL, Slope
